# Supplementary material
Source: publisher figshare collection journal article supplement (https://acs.figshare.com/ndownloader/files/5734194)
Supplement: Supplementary file 1 [file 5734194]

Akihiko Ouchi,\* Zhong Li, Masako Sakuragi, and Tetsuro Majima

**A Two-Color Laser Photolysis Method for Determining Reaction Rates of Short-Lived Intermediates by Product Analysis: Application to the *o*-Quinodimethane Problem - Supporting Information**

**[1] Derivation of eq 4 from eqs 1, 1', 2, and 3.**

Equation 1' is converted to

$$[\mathbf{1}]_0 = \frac{[\mathbf{4}]_\infty}{a} \quad (1'')$$

From eqs 1'' and 1, we obtain

$$[\mathbf{4}]_t = [\mathbf{4}]_\infty - a[\mathbf{1}]_t \quad (1''')$$

When eqs 1''' and 2 are substituted to eq 3, we obtain

$$\begin{aligned} [\mathbf{4}]_\infty^L_t &= [\mathbf{4}]_\infty - a[\mathbf{1}]_t + a(1-b)[\mathbf{1}]_t \\ &= [\mathbf{4}]_\infty - ab[\mathbf{1}]_t \\ \therefore [\mathbf{1}]_t &= \frac{[\mathbf{4}]_\infty}{ab} - [\mathbf{4}]_\infty^L_t \end{aligned} \quad (4)$$

**[2] Derivation of eq 7 from eq 6.**

Equation 6 is

$$-\frac{d[\mathbf{1}]_t}{dt} = k_1 [\mathbf{2}]_t [\mathbf{1}]_t + k_2 [\mathbf{1}]_t^2 \quad (6)$$

When we put

$$u = \frac{1}{[\mathbf{1}]_t}$$

and substitute  $u$  to eq 6, we obtain a differential equation

$$\frac{du}{dt} - k_1 [\mathbf{2}]_t u = k_2 \quad (9)$$

When  $[\mathbf{1}]_t$  is a constant, eq 9 can be solved as

$$u = \frac{1}{[\mathbf{1}]_t} = \{C_1 + k_2 \int \exp(-W) dt\} \exp W \quad (10)$$

where

$$W = \int k_1 [\mathbf{2}]_t dt = k_1 [\mathbf{2}]_t t + C_2$$

and  $C_1$  and  $C_2$  are constants. As

$$\int \exp(-W) dt = \int \exp(-k_1 [\mathbf{2}]_t t - C_2) dt = -\frac{\exp(-k_1 [\mathbf{2}]_t t - C_2)}{k_1 [\mathbf{2}]_t} + C_3$$

where  $C_3$  is a constant, eq 10 becomes

$$\begin{aligned} \frac{1}{[\mathbf{1}]_t} &= [C_1 + k_2 \left\{ C_3 - \frac{\exp(-k_1 [\mathbf{2}]_t t - C_2)}{k_1 [\mathbf{2}]_t} \right\}] \exp(k_1 [\mathbf{2}]_t t + C_2) \\ &= (C_1 + k_2 C_3) \exp(k_1 [\mathbf{2}]_t t + C_2) - \frac{k_2}{k_1 [\mathbf{2}]_t} \\ &= (C_1 \exp C_2 + k_2 C_3 \exp C_2) \exp(k_1 [\mathbf{2}]_t t) - \frac{k_2}{k_1 [\mathbf{2}]_t} \end{aligned} \quad (11)$$

At  $t = 0$ ,  $[\mathbf{1}]_t$  is  $[\mathbf{1}]_0$ , so that from eq 11

$$\begin{aligned} \frac{1}{[\mathbf{1}]_0} &= (C_1 \exp C_2 + k_2 C_3 \exp C_2) - \frac{k_2}{k_1 [\mathbf{2}]_t} \\ \therefore C_1 \exp C_2 + k_2 C_3 \exp C_2 &= \frac{k_2}{k_1 [\mathbf{2}]_t} + \frac{1}{[\mathbf{1}]_0} \end{aligned} \quad (12)$$

When we substitute eq 12 to eq 11, we obtain eq 7.

$$\frac{1}{[\mathbf{1}]_t} = \left( \frac{k_2}{k_1 [\mathbf{2}]_t} + \frac{1}{[\mathbf{1}]_0} \right) \exp(k_1 [\mathbf{2}]_t t) - \frac{k_2}{k_1 [\mathbf{2}]_t} \quad (7)$$
